# Supplementary material for: The Influence of Si/Al Ratios on Adsorption and Desorption Characterizations of Pd/Beta Served as Cold-Start Catalysts
Source: MDPI journal article supplement (doi:10.3390/ma12071045), 2019-03-29

Supplementary Materials

# The Influence of Si/Al Ratios on Adsorption and Desorption Characterizations of Pd/Beta Served as Cold-Start Catalysts

Ming Jiang <sup>1</sup>, Jun Wang <sup>1</sup>, Jianqiang Wang <sup>1</sup> and Meiqing Shen <sup>1,2,3,\*</sup>

<sup>1</sup> Key Laboratory for Green Chemical Technology of State Education Ministry, School of Chemical Engineering & Technology, Tianjin University, Tianjin 300072, China; jiangming@tju.edu.cn (M.J.); wangjun@tju.edu.cn (J.W.); jianqiangwang@tju.edu.cn (J.W.)

<sup>2</sup> Collaborative Innovation Center of Chemical Science and Engineering (Tianjin), Tianjin 300072, China

<sup>3</sup> State Key Laboratory of Engines, Tianjin University, Tianjin 300072, China

\* Correspondence: mqshen@tju.edu.cn

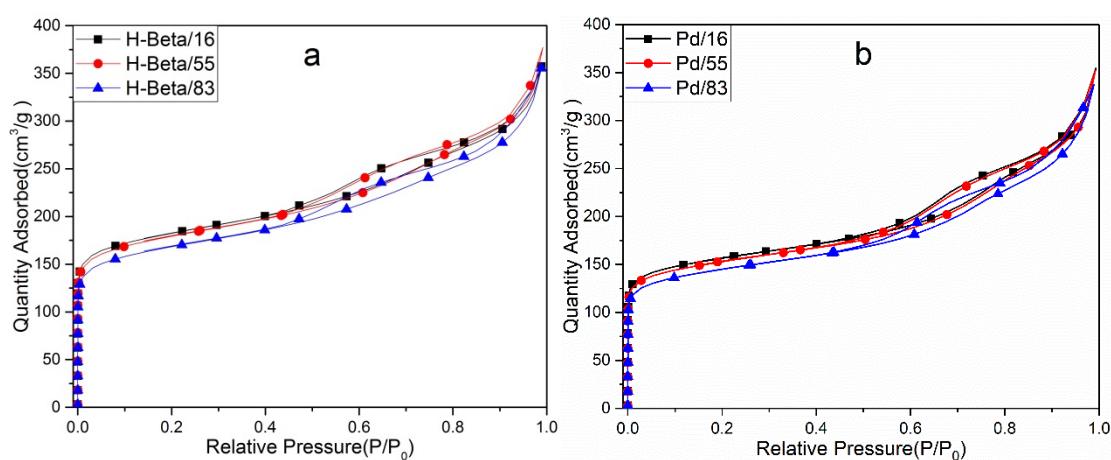

**Figure S1.** N<sub>2</sub> adsorption-desorption isotherm of H-Beta (a) and Pd/Beta (b) samples with different Si/Al ratios.

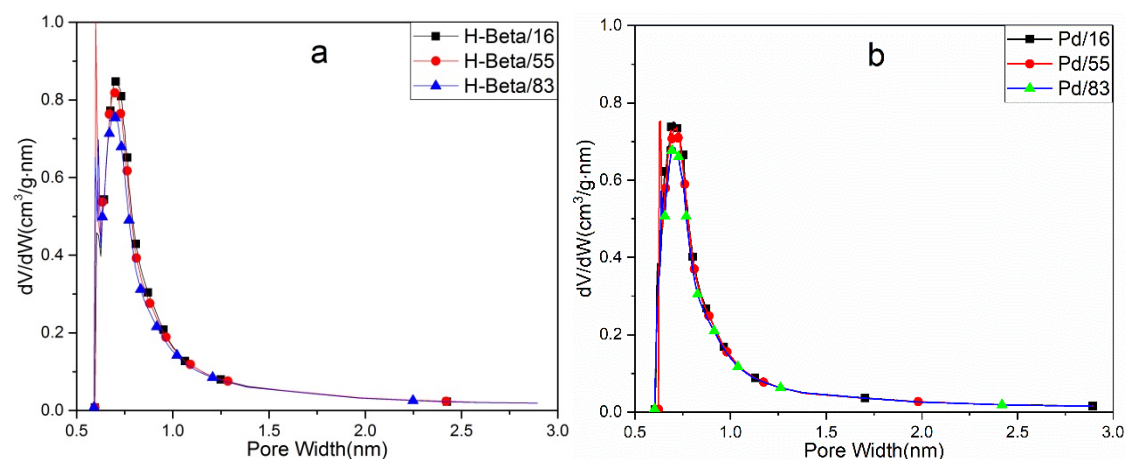

**Figure S2.** Pore size distribution curves of H-Beta (a) and Pd/Beta (b) samples with different Si/Al ratios.

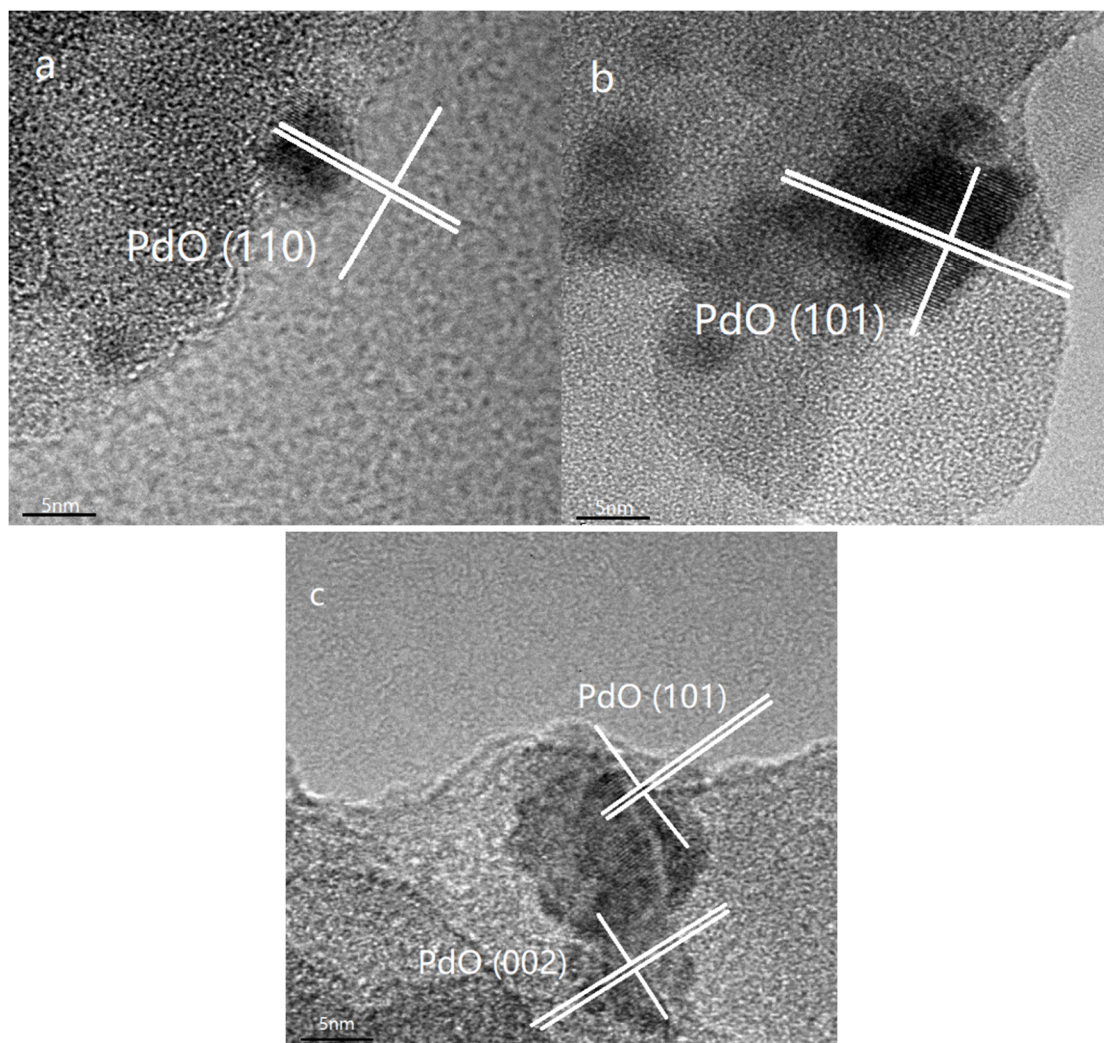

**Figure S3.** HRTEM figures of each sample (a: Pd/16; b: Pd/55; c: Pd/83).

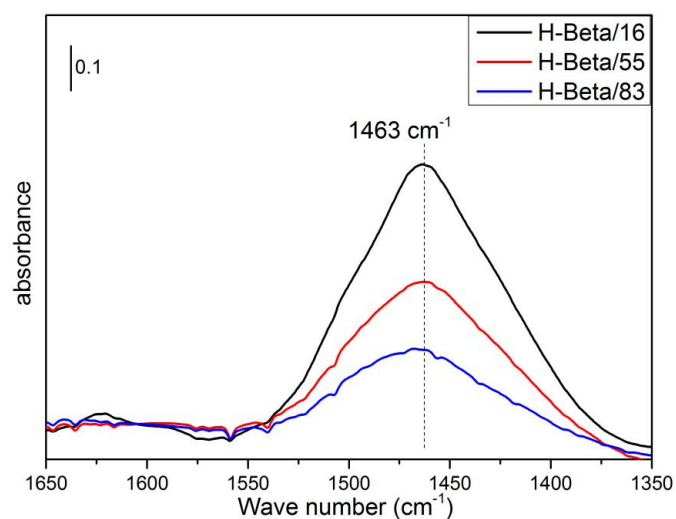

**Figure S4.** In situ FT-IR of NH<sub>3</sub> adsorption (Temperature: 80 °C; Flow: 500 ppm NH<sub>3</sub> + N<sub>2</sub>).

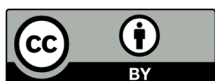

Supplement: s1 [file s1]
